# Supplementary material
Source: publisher figshare collection journal article supplement (https://aacr.figshare.com/ndownloader/files/39854631)
Supplement: Supplementary file 1 [file 39854631]

## Sheet: BP
	MNCs-vs-1W
GO ID	GO Term	P-value	FDR
GO:0006955	immune response	1.82366e-84	7.85998e-82
GO:0002684	positive regulation of immune system process	6.2551e-47	6.73987e-45
GO:0009607	response to biotic stimulus	1.38834e-43	9.97291e-42
GO:0002682	regulation of immune system process	1.62981e-43	1.0035e-41
GO:0051707	response to other organism	1.44464e-42	6.9182e-41
GO:0001775	cell activation	1.88065e-42	8.10559e-41
GO:0045321	leukocyte activation	2.43648e-38	9.54657e-37
GO:0002252	immune effector process	6.57354e-38	2.36099e-36
GO:0002253	activation of immune response	7.65034e-30	2.53638e-28
GO:0008219	cell death	1.00052e-21	2.53662e-20
GO:0048583	regulation of response to stimulus	3.4172e-21	7.75166e-20
GO:0070661	leukocyte proliferation	2.00567e-20	4.11639e-19
GO:0019882	antigen processing and presentation	3.70483e-20	7.2581e-19
GO:0001816	cytokine production	5.18848e-20	9.72277e-19
GO:0048584	positive regulation of response to stimulus	8.76606e-19	1.51127e-17
	1W-vs-2W
GO ID	GO Term	P-value	FDR
GO:0006955	immune response	2.22012e-107	8.23664e-105
GO:0002684	positive regulation of immune system process	1.66669e-89	3.09171e-87
GO:0002682	regulation of immune system process	3.67892e-80	4.5496e-78
GO:0002253	activation of immune response	1.48746e-56	1.37962e-54
GO:0001775	cell activation	1.87005e-49	1.38758e-47
GO:0045321	leukocyte activation	2.96073e-48	1.83072e-46
GO:0048584	positive regulation of response to stimulus	1.52757e-47	8.09612e-46
GO:0002252	immune effector process	6.94896e-47	2.86452e-45
GO:0009607	response to biotic stimulus	2.47085e-38	8.33349e-37
GO:0048583	regulation of response to stimulus	4.33619e-38	1.34061e-36
GO:0051707	response to other organism	1.44628e-37	4.12745e-36
GO:0009605	response to external stimulus	6.54018e-36	1.73315e-34
GO:0050900	leukocyte migration	2.72917e-35	6.32827e-34
GO:0001816	cytokine production	9.13709e-31	1.88326e-29
GO:0042330	taxis	1.42038e-27	2.42367e-26
	2W-vs-3W
GO ID	GO Term	P-value	FDR
GO:0006955	immune response	4.72097e-50	2.9211e-48
GO:0002682	regulation of immune system process	2.46394e-41	9.38193e-40
GO:0045321	leukocyte activation	4.32121e-40	1.52786e-38
GO:0008219	cell death	6.01285e-39	1.86022e-37
GO:0002684	positive regulation of immune system process	6.78095e-39	1.97445e-37
GO:0001775	cell activation	8.87409e-38	2.31193e-36
GO:0002253	activation of immune response	6.6218e-30	1.26069e-28
GO:0002252	immune effector process	1.5214e-28	2.78923e-27
GO:0048583	regulation of response to stimulus	2.50263e-27	4.4243e-26
GO:0051707	response to other organism	2.93802e-26	5.01489e-25
GO:0009607	response to biotic stimulus	3.69237e-26	6.09242e-25
GO:0022402	cell cycle process	1.89081e-25	2.92484e-24
GO:0009056	catabolic process	2.16977e-25	3.25465e-24
GO:0048584	positive regulation of response to stimulus	1.5887e-24	2.31296e-23
GO:0007049	cell cycle	6.44675e-22	7.97786e-21

## Sheet: MF
MNCs-vs-1W
GO ID	GO Term	P-value	FDR
GO:0003823	antigen binding	6.21e-17	1.03e-15
GO:0030246	carbohydrate binding	9.31e-08	6.08e-07
GO:0008289	lipid binding	8.2e-06	4.16e-05
GO:0038024	cargo receptor activity	2.59e-05	0.00012013
GO:0004601	peroxidase activity	3.44e-05	0.0001544
GO:0071814	protein-lipid complex binding	7.52e-05	0.00031478
GO:0016787	hydrolase activity	0.00028602	0.00109093
GO:0061134	peptidase regulator activity	0.00031586	0.00118378
GO:0001871	pattern binding	0.0009927	0.00345045
GO:0019239	deaminase activity	0.00184013	0.00610074
GO:0001618	viral receptor activity	0.0022706	0.0073581
GO:0008047	enzyme activator activity	0.00242028	0.00778464
GO:0046906	tetrapyrrole binding	0.0029933	0.00948612
1W-vs -2W
GO ID	GO Term	P-value	FDR
GO:0004871	signal transducer activity	6.9206e-13	5.5816e-12
GO:0038023	signaling receptor activity	1.7502e-12	1.2986e-11
GO:0030246	carbohydrate binding	4.429e-10	2.6937e-09
GO:0008329	pattern recognition receptor activity	8.7596e-10	4.9997e-09
GO:0003823	antigen binding	1.3134e-09	7.2729e-09
GO:0061134	peptidase regulator activity	8.0476e-09	4.327e-08
GO:0001871	pattern binding	2.393e-06	1.0696e-05
GO:0008289	lipid binding	1.3924e-05	5.8043e-05
GO:0038024	cargo receptor activity	3.3889e-05	0.00013097
GO:0004857	enzyme inhibitor activity	0.00033602	0.0011032
GO:0042277	peptide binding	0.00068655	0.00217702
GO:0050840	extracellular matrix binding	0.00123241	0.00378839
GO:0001530	lipopolysaccharide binding	0.0020184	0.00589627
GO:0004601	peroxidase activity	0.00216995	0.00628947
GO:0070891	lipoteichoic acid binding	0.00322064	0.00912106
2W-vs -3W
GO ID	GO Term	P-value	FDR
GO:0097159	organic cyclic compound binding	1.0144e-18	1.0916e-17
GO:0036094	small molecule binding	2.2131e-17	2.0669e-16
GO:0043021	ribonucleoprotein complex binding	3.7982e-11	2.8925e-10
GO:0003735	structural constituent of ribosome	1.0715e-10	7.2655e-10
GO:0003823	antigen binding	6.9753e-08	3.9236e-07
GO:0016740	transferase activity	1.0975e-07	6.0363e-07
GO:0016787	hydrolase activity	1.3511e-07	7.2696e-07
GO:0016853	isomerase activity	3.8876e-05	0.00015153
GO:0016491	oxidoreductase activity	6.7647e-05	0.00025758
GO:0004601	peroxidase activity	0.00010067	0.00037467
GO:0043028	cysteine-type endopeptidase regulator activity involved in apoptotic process	0.00022842	0.00079624
GO:0051540	metal cluster binding	0.00023919	0.00082221
GO:0048037	cofactor binding	0.00035324	0.00119762
GO:0016874	ligase activity	0.00087733	0.00280178
GO:0060589	nucleoside-triphosphatase regulator activity	0.00178577	0.00535732
